# Supplementary material for: A Longitudinal Analysis of Alcohol Use Behavior among Korean Adults and Related Factors: A Latent Class Growth Model
Source: MDPI journal article supplement (doi:10.3390/ijerph18168797), 2021-08-20
Supplement: s1 [file s1]

Table S1. General Characteristics according to Each Class (N=8267)

| Characteristics     | Categories                             | Moderate to low risk<br>class<br>(Class 1, 7.31%) | Low to moderate risk<br>class<br>(Class 2, 5.93%) | Stable moderate risk<br>class<br>(Class 3, 13.25%) | Stable low risk<br>Class<br>(Class 4, 73.52%) | Total       | $\chi^2$ | <i>p</i> |
|---------------------|----------------------------------------|---------------------------------------------------|---------------------------------------------------|----------------------------------------------------|-----------------------------------------------|-------------|----------|----------|
|                     |                                        | n (%)                                             | n (%)                                             | n (%)                                              | n (%)                                         |             |          |          |
| Age(yrs)            | 19-29                                  | 18 (3.0)                                          | 129 (26.3)                                        | 38 (3.5)                                           | 930 (15.3)                                    | 1115 (13.5) | 315.033  | <.001    |
|                     | 30-39                                  | 98 (16.2)                                         | 127 (25.9)                                        | 238 (21.7)                                         | 1394 (22.9)                                   | 1857 (22.5) |          |          |
|                     | 40-49                                  | 207 (34.3)                                        | 133 (27.1)                                        | 440 (40.2)                                         | 1817 (29.9)                                   | 2597 (31.4) |          |          |
|                     | 50-60                                  | 281 (46.5)                                        | 101 (20.6)                                        | 379 (34.6)                                         | 1937 (31.9)                                   | 2698 (32.6) |          |          |
| Gender              | Male                                   | 521 (86.3)                                        | 344 (70.2)                                        | 984 (89.9)                                         | 2145 (35.3)                                   | 3994 (48.3) | 1612.045 | <.001    |
|                     | Female                                 | 83 (13.7)                                         | 146 (29.8)                                        | 111 (10.1)                                         | 3933 (64.7)                                   | 4273 (51.7) |          |          |
| Occupation          | Unemployed                             | 113 (18.7)                                        | 92 (18.8)                                         | 114 (10.4)                                         | 2013 (33.1)                                   | 2332 (28.2) | 292.099  | <.001    |
|                     | Employed                               | 491 (81.3)                                        | 398 (81.2)                                        | 981 (89.6)                                         | 4065 (66.9)                                   | 5935 (71.8) |          |          |
| Type of family      | Intact families                        | 560 (92.7)                                        | 416 (84.9)                                        | 979 (89.4)                                         | 5632 (92.7)                                   | 7587 (91.8) | 55.176   | <.001    |
|                     | Single-person<br>families              | 41 (6.8)                                          | 63 (12.9)                                         | 105 (9.6)                                          | 363 (6.0)                                     | 572 (6.9)   |          |          |
|                     | Grandparent/single-<br>parent families | 3 (0.5)                                           | 11 (2.2)                                          | 11 (1.0)                                           | 83 (1.4)                                      | 108 (1.3)   |          |          |
|                     | High school<br>graduates or below      | 353 (58.4)                                        | 274 (55.9)                                        | 605 (55.3)                                         | 3345 (55.0)                                   | 4577 (55.4) |          |          |
| Level of education  | College graduates<br>or above          | 251 (41.6)                                        | 216 (44.1)                                        | 490 (44.7)                                         | 2733 (45.0)                                   | 3690 (44.6) | 2.652    | .448     |
|                     |                                        |                                                   |                                                   |                                                    |                                               |             |          |          |
| Household<br>income | Low-income                             | 524 (86.8)                                        | 437 (89.2)                                        | 984 (89.9)                                         | 5256 (86.5)                                   | 7201 (87.1) | 11.509   | .009     |
|                     | Regular-income                         | 80 (13.2)                                         | 53 (10.8)                                         | 111 (10.1)                                         | 822 (13.5)                                    | 1066 (12.9) |          |          |

Table S2. The number of subjects were evaluated in each wave (N=8267)

| Wave | Year | n     | %    |
|------|------|-------|------|
| 1    | 2009 | 6,149 | 74.4 |
| 2    | 2010 | 6,259 | 75.7 |
| 3    | 2011 | 6,298 | 76.2 |
| 4    | 2012 | 7,399 | 89.5 |
| 5    | 2013 | 7,284 | 88.1 |
| 6    | 2014 | 7,074 | 85.6 |
| 7    | 2015 | 6,900 | 83.5 |
| 8    | 2016 | 6,633 | 80.2 |
| 9    | 2017 | 6,437 | 77.9 |
| 10   | 2018 | 6,206 | 75.1 |
| 11   | 2019 | 5,960 | 72.1 |
